# Supplementary material for: Toward a standardized methodology for sampling dung beetles (Coleoptera: Scarabaeinae) in the Neotropics: A critical review
Source: Frontiers journal article supplement (doi:10.3389/fevo.2023.1096208), 2023-03-02
Supplement: Data_Sheet_1.pdf [file Data_Sheet_1.pdf]

| Author                      | Year | Title                                                                                                                                                                                    | Journal                                                |
|-----------------------------|------|------------------------------------------------------------------------------------------------------------------------------------------------------------------------------------------|--------------------------------------------------------|
| Abot et al.                 | 2010 | Abundance and diversity of coprophagous beetles (Coleoptera: Scarabaeidae) caught with a light trap in a pasture area of the Brazilian Cerrado                                           | Studies on Neotropical Fauna and Environment           |
| Almeida et al.              | 2021 | Dung beetles can sow: the potential of secondary seed dispersers to assist ecological restoration                                                                                        | Ecological Entomology                                  |
| Alvarado et al.             | 2014 | Diversity and biogeographical makeup of the dung beetle communities inhabiting two mountains in the Mexican Transition Zone                                                              | Organisms Diversity & Evolution                        |
| Alvarado et al.             | 2019 | Linking dung beetle diversity and its ecological function in a gradient of livestock intensification management in the Neotropical region                                                | Applied Soil Ecology                                   |
| Alvarado et al.             | 2020 | Different responses of dung beetle diversity and feeding guilds from natural and disturbed habitats across a subtropical elevational gradient                                            | Acta Oecologica                                        |
| Alvarado et al.             | 2021 | Diversity and resource selection of dung beetles in a relictual mountain forest in Brazil                                                                                                | International Journal of Tropical Insect Science       |
| Alvarez et al.              | 2016 | Record of Scarabaeoidea Larvae and Adults Associated with <i>Amaranthus hypochondriacus</i> L. and Living Fences                                                                         | Southwestern Entomologist                              |
| Alves et al.                | 2019 | Local extinctions may be evidenced by the holes of the morphometric hypervolume in dung beetle communities                                                                               | Austral Ecology                                        |
| Alves et al.                | 2020 | Dung beetles and the conservation of diversity in an agricultural landscape with maize fields and Atlantic Forest remnants                                                               | Acta Oecologica                                        |
| Amezquita & Favila          | 2010 | Removal Rates of Native and Exotic Dung by Dung Beetles (Scarabaeidae: Scarabaeinae) in a Fragmented Tropical Rain Forest                                                                | Environmental Entomology                               |
| Amezquita & Favila          | 2011 | Carion Removal Rates and Diel Activity of Necrophagous Beetles (Coleoptera: Scarabaeinae) in a Fragmented Tropical Rain Forest                                                           | Environmental Entomology                               |
| Andresen                    | 2002 | Dung beetles in a Central Amazonian rainforest and their ecological role as secondary seed dispersers                                                                                    | Ecological Entomology                                  |
| Andresen                    | 2002 | Primary seed dispersal by red howler monkeys and the effect of defecation patterns on the fate of dispersed seeds                                                                        | Biotropica                                             |
| Andresen                    | 2003 | Effect of forest fragmentation on dung beetle communities and functional consequences for plant regeneration                                                                             | Ecography                                              |
| Andresen                    | 2005 | Effects of season and vegetation type on community organization of dung beetles in a tropical dry forest                                                                                 | Biotropica                                             |
| Andresen                    | 2008 | Dung beetle assemblages in primary forest and disturbed habitats in a tropical dry forest landscape in Western Mexico                                                                    | Journal of Insect Conservation                         |
| Andresen & Laurance         | 2006 | Possible indirect effects of mammal hunting on dung beetle assemblages in Panama                                                                                                         | Biotropica                                             |
| Anduaga                     | 2004 | Impact of the activity of dung beetles (Coleoptera : Scarabaeidae : Scarabaeinae) inhabiting pasture land in Durango, Mexico                                                             | Environmental Entomology                               |
| Anduaga & Huerta            | 2007 | Importance of dung incorporation activity by three species of coprophagous beetle (Coleoptera : Scarabaeidae : Scarabaeinae) macrofauna in pastureland on La Michilila Biosphere Reserve | Environmental Entomology                               |
| Arellano & Castillo-Guevara | 2014 | Effect of uncontrolled forest fires on the coprophagous beetle assemblages (Coleoptera: Scarabaeidae) in a temperate forest in Central Mexico                                            | Revista Mexicana de Biodiversidad                      |
| Arellano et al.             | 2005 | Diversity of dung and carrion beetles in a disturbed Mexican tropical montane cloud forest and on shade coffee plantations                                                               | Biodiversity and Conservation                          |
| Arellano et al.             | 2008 | Response of dung beetle assemblages to landscape structure in remnant natural and modified habitats in southern Mexico                                                                   | Insect Conservation and Diversity                      |
| Arellano et al.             | 2013 | Acacia woodlots, cattle and dung beetles (Coleoptera: Scarabaeinae) in a Mexican silvopastoral landscape                                                                                 | Revista Mexicana de Biodiversidad                      |
| Arias-Alvarez et al.        | 2022 | Effect of vegetation cover on dung beetles (Coleoptera: Scarabaeinae) and their ecological functions in an Andean forest of Colombia                                                     | Revista de Biología Tropical                           |
| Arriaga et al.              | 2012 | Biogeographical affinities and species richness of copronecrophagous beetles                                                                                                             | REVISTA MEXICANA DE BIODIVERSIDAD                      |
| Audino et al.               | 2011 | Scarabaeinae (Coleoptera: Scarabaeidae) from an eucalyptus forest                                                                                                                        | IHERINGIA SERIE ZOOLOGIA                               |
| Avendano-Mendoza et al.     | 2005 | Dung beetle community (Coleoptera : Scarabaeidae : Scarabaeinae) in a tropical landscape                                                                                                 | BIODIVERSITY AND CONSERVATION                          |
| Barragan et al.             | 2011 | Negative Impacts of Human Land Use on Dung Beetle Functional Diversity                                                                                                                   | PLOS ONE                                               |
| Barragan et al.             | 2011 | Negative Impacts of Human Land Use on Dung Beetle Functional Diversity                                                                                                                   | PLOS ONE                                               |
| Barragan et al.             | 2011 | Negative Impacts of Human Land Use on Dung Beetle Functional Diversity                                                                                                                   | PLOS ONE                                               |
| Barragan et al.             | 2014 | The impact of grazing on dung beetle diversity depends on both biogeographical                                                                                                           | JOURNAL OF BIOGEOGRAPHY                                |
| Barragan et al.             | 2021 | Response of dung beetle diversity to three livestock management systems                                                                                                                  | JOURNAL OF ARID ENVIRONMENTS                           |
| Barraza et al.              | 2010 | Assemblage of Coprophagous Beetles (Scarabaeidae: Scarabaeinae) of Tropical Dry Forest                                                                                                   | REVISTA COLOMBIANA ENTOMOLOGIA                         |
| Barretto et al.             | 2019 | Annual Abundance and Population Structure of Two Dung Beetle Species                                                                                                                     | INSECTS                                                |
| Barretto et al.             | 2020 | Diversity of dung beetles in three vegetation physiognomies                                                                                                                              | INTERN J TROPICAL INSECT SCIENCE                       |
| Basto-Estrella et al.       | 2012 | Dung beetles (Coleoptera: Scarabaeidae: Scarabaeinae) from cattle ranches                                                                                                                | REVISTA MEXICANA DE BIODIVERSIDAD                      |
| Basto-Estrella et al.       | 2014 | Dung beetle (Coleoptera: Scarabaeinae) diversity and seasonality in response                                                                                                             | INSECT CONSERVATION AND DIVERSITY                      |
| Basto-Estrella et al.       | 2016 | Dung removal by dung beetles (Coleoptera: Scarabaeidae) and macrocyclic lactone                                                                                                          | REVISTA DE BIOLOGIA TROPICAL                           |
| Batilani-Filho & Hernandez  | 2017 | Decline of Ecological Functions Performed by Dung Beetles in Areas of Atlantic                                                                                                           | ENVIRONMENTAL ENTOMOLOGY                               |
| Bitencourt & DaSilva        | 2016 | Forest regeneration affects dung beetle assemblages (Coleoptera: Scarabaeinae) in the southern                                                                                           | Journal of Insect Conservation                         |
| Bitencourt et al.           | 2020 | Forest complexity drives dung beetle assemblages along an edge-interior gradient in the southwest Amazon rainforest                                                                      | ECOLOGICAL ENTOMOLOGY                                  |
| Bogoni & Hernández          | 2014 | Attractiveness of Native Mammal's Feces of Different Trophic Guilds to Dung Beetles (Coleoptera: Scarabaeinae)                                                                           | JOURNAL OF INSECT SCIENCE                              |
| Bogoni et al.               | 2016 | Contributions of the mammal community, habitat structure, and spatial distance to dung beetle community structure                                                                        | BIODIVERSITY AND CONSERVATION                          |
| Bourg et al.                | 2016 | Got Dung? Resource Selection by Dung Beetles in Neotropical Forest Fragments and Cattle Pastures                                                                                         | NEOTROPICAL ENTOMOLOGY                                 |
| Braga et al.                | 2012 | Are Dung Beetles Driving Dung-Fly Abundance in Traditional Agricultural Areas in the Amazon?                                                                                             | ECOSYSTEMS                                             |
| Braga et al.                | 2013 | Dung Beetle Community and Functions along a Habitat-Disturbance Gradient in the Amazon: A Rapid Assessment of Ecological Functions Associated to Biodiversity                            | PLOS ONE                                               |
| Cabrero-Sanudo et al.       | 2007 | Phenology, reproductive cycles, and species composition of a dung beetle community (Coleoptera : Scarabaeoidea) from a high mountain pasture system on the Oriental Neovolcanic Axis     | PROCEEDINGS OF THE ENTOMOLOGICAL SOCIETY OF WASHINGTON |
| Camero                      | 2019 | Diversity of dung beetles (Coleoptera: Scarabaeidae) of the northern zone from Serrania de La Lindosa, Guaviare-Colombia                                                                 | ACTA BIOLOGICA COLOMBIANA                              |
| Campos & Hernández          | 2013 | Dung beetle assemblages (Coleoptera, Scarabaeinae) in Atlantic forest fragments in southern Brazil                                                                                       | REVISTA BRASILEIRA DE ENTOMOLOGIA                      |
| Campos & Hernández          | 2015 | Changes in the dynamics of functional groups in communities of dung beetles in Atlantic forest fragments adjacent to transgenic maize crops                                              | ECOLOGICAL INDICATORS                                  |
| Campos & Hernández          | 2015 | The Importance of Maize Management on Dung Beetle Communities in Atlantic Forest Fragments                                                                                               | PLOS ONE                                               |
| Carvalho et al.             | 2020 | Is dung removal a good proxy for other dung beetle functions when monitoring for conservation? A case study from the Brazilian Amazon                                                    | ECOLOGICAL INDICATORS                                  |
| Chaves et al.               | 2017 | Soil quality index of an Oxisol under different land uses in the Brazilian savannah                                                                                                      | GEODERMA REGIONAL                                      |
| Correa et al.               | 2013 | Dung beetles (Coleoptera, Scarabaeinae) attracted to sheep dung                                                                                                                          | REVISTA BRASILEIRA DE ENTOMOLOGIA                      |
| Correa et al.               | 2016 | Attractiveness of baits to dung beetles in Brazilian savanna and exotic pasturelands                                                                                                     | ENTOMOLOGICAL SCIENCE                                  |
| Correa et al.               | 2016 | Using dung beetles to evaluate the conversion effects from native to introduced pasture in the Brazilian Pantanal                                                                        | JOURNAL OF INSECT CONSERVATION                         |
| Correa et al.               | 2018 | Optimising Methods for Dung Beetle (Coleoptera: Scarabaeidae) Sampling in Brazilian Pastures                                                                                             | ENVIRONMENTAL ENTOMOLOGY                               |
| Correa et al.               | 2019 | Patterns of taxonomic and functional diversity of dung beetles in a human-modified variegated landscape in Brazilian Cerrado                                                             | JOURNAL OF INSECT CONSERVATION                         |
| Correa et al.               | 2020 | Impacts of Exotic Pasture Establishment on Dung Beetle Assemblages (Coleoptera: Scarabaeidae: Scarabaeinae) in the Brazilian Cerrado                                                     | ENVIRONMENTAL ENTOMOLOGY                               |
| Correa et al.               | 2021 | Greenspace sites conserve taxonomic and functional diversity of dung beetles in an urbanized landscape in the Brazilian Cerrado                                                          | URBAN ECOSYSTEMS                                       |
| Correa et al.               | 2021 | Quantifying responses of dung beetle assemblages to cattle grazing removal over a short-term in introduced Brazilian pastures                                                            | ACTA OEOLOGICA-INTERNATIONAL JOURNAL OF ECOLOGY        |
| Correa et al.               | 2021 | Rainfall seasonality drives the spatiotemporal patterns of dung beetles in Amazonian forests in the arc of deforestation                                                                 | JOURNAL OF INSECT CONSERVATION                         |
| Correa et al.               | 2021 | Residential sites increase species loss and cause high temporal changes in functional diversity of dung beetles in an urbanized Brazilian Cerrado landscape                              | JOURNAL OF INSECT CONSERVATION                         |
| Correa et al.               | 2021 | Spatiotemporal patterns of taxonomic and functional beta-diversity of dung beetles in native and introduced pastures in the Brazilian Pantanal                                           | AUSTRAL ECOLOGY                                        |
| Costa et al.                | 2013 | What is the importance of open habitat in a predominantly closed forest                                                                                                                  | REVISTA BRASILEIRA DE ENTOMOLOGIA                      |
| Cruz et al.                 | 2012 | Degradation of cattle dung by dung beetles in tropical grassland                                                                                                                         | REVISTA COLOMBIANA DE ENTOMOLOGIA                      |
| da Costa et al.             | 2009 | Diversity of Scarabaeinae (Coleoptera, Scarabaeidae) collected with flight intercept trap                                                                                                | REVISTA BRASILEIRA DE ENTOMOLOGIA                      |
| da Costa et al.             | 2014 | Changes in the dung beetle community in response to restings forest degradation                                                                                                          | JOURNAL OF INSECT CONSERVATION                         |
| da Cunha & Frizzas          | 2020 | Spatial structure of the diversity of dung beetles (Scarabaeidae: Scarabaeinae) in savanna                                                                                               | BIODIVERSITY AND CONSERVATION                          |
| da Silva                    | 2011 | Dung Beetles (Coleoptera: Scarabaeidae: Scarabaeinae) of Two Non-Native Habitats                                                                                                         | ZOOLOGICAL STUDIES                                     |
| da Silva & Di Mare          | 2012 | Copro-necrophagous beetles (Coleoptera: Scarabaeidae: Scarabaeinae) from Atlantic Forest fragments of...                                                                                 | IHERINGIA SERIE ZOOLOGIA                               |
| da Silva & Hernandez        | 2014 | Local and Regional Effects on Community Structure of Dung Beetles...                                                                                                                     | PLOS ONE                                               |
| da Silva & Hernandez        | 2015 | Scale-Dependence of Processes Structuring Dung Beetle Metacommunities Using Functional Diversity...                                                                                      | PLOS ONE                                               |
| da Silva & Hernandez        | 2015 | Spatial Patterns of Movement of Dung Beetle Species in a...                                                                                                                              | PLOS ONE                                               |
| da Silva & Hernandez        | 2016 | Spatial variation of dung beetle assemblages associated with forest structure...                                                                                                         | REVISTA BRASILEIRA DE ENTOMOLOGIA                      |
| da Silva & Hernandez        | 2018 | Spatial but not temporal dung beetle beta-diversity components are scale-dependent...                                                                                                    | AUSTRAL ECOLOGY                                        |
| da Silva et al.             | 2007 | Comunidade de escarabeíneos (Coleoptera, Scarabaeidae) copro-necrófagos da região de Brejo...                                                                                            | REVISTA BRASILEIRA DE ENTOMOLOGIA                      |
| da Silva et al.             | 2010 | Habitat Heterogeneity, Richness and Structure of Assemblages of Dung Beetles...                                                                                                          | Neotropical Entomology                                 |
| da Silva et al.             | 2010 | Study of the Dung Beetle (Coleoptera: Scarabaeidae) Community at Two...                                                                                                                  | ENVIRONMENTAL ENTOMOLOGY                               |

|                              |                                                                                                                 |                                                        |
|------------------------------|-----------------------------------------------------------------------------------------------------------------|--------------------------------------------------------|
| da Silva et al.              | 2012 Attractiveness of Different Bait to the Scarabaeinae (Coleoptera: Scarabaeidae) in...                      | Zoological Studies                                     |
| da Silva et al.              | 2012 Dung beetles (Coleoptera: Scarabaeidae: Scarabaeinae) from native grassland in Pampa...                    | BIOTA NEOTROPICA                                       |
| da Silva et al.              | 2013 Diversity and seasonality of Scarabaeinae (Coleoptera: Scarabaeidae) in forest fragments...                | Anais da Academia Brasileira de Ciências               |
| da Silva et al.              | 2017 Abrupt species loss of the Amazonian dung beetle in pastures...                                            | JOURNAL OF INSECT CONSERVATION                         |
| da Silva et al.              | 2019 Patch and landscape effects on forest-dependent dung beetles are masked...                                 | SCIENCE OF THE TOTAL ENVIRONMENT                       |
| da Silva et al.              | 2020 Species composition and community structure of dung beetles                                                | ZOOLOGIA                                               |
| da Silva et al.              | 2022 Dung beetle beta-diversity across Brazilian tropical dry forests does not...                               | AUSTRAL ECOLOGY                                        |
| Damborsky et al.             | 2015 Spatial and Temporal Variation of Dung Beetle Assemblages in a...                                          | Neotropical Entomology                                 |
| de Almeida & Louzada         | 2009 Community Structure of Scarabaeinae (Scarabaeidae: Coleoptera) in Brazilian Savannah Phytophysiognomies... | Neotropical Entomology                                 |
| de Carvalho et al.           | 2021 Edaphic entomofauna associated with coconut crops in the eastern Amazon                                    | Semina                                                 |
| de Farias & Medina-Hernandez | 2017 Dung Beetles Associated with Agroecosystems of Southern Brazil: Relationship with...                       | Revista Brasileira de ciencia do solo                  |
| de Farias et al.             | 2015 Response of the copro-necrophagous beetle (Coleoptera: Scarabaeinae) assemblage to a...                    | Journal of Insect Conservation                         |
| de Lima et al.               | 2015 Structure and organization of Scarabaeinae assemblages (Coleoptera, Scarabaeidae) in different...          | Iheringia, Série Zoologia                              |
| de Moura et al.              | 2021 Dung beetles in a tight-spot, but not so much...                                                           | Forest Ecology and Management                          |
| de Oliveira et al.           | 2021 Seasonality and distribution of Coleoptera families (Arthropoda, Insecta) in the...                        | Revista Brasileira de entomologia                      |
| Deloya et al.                | 2007 Fauna of Scarabaeidae-laparosticti and Trogidae (Coleoptera : Scarabaeoidea) associated with cloud...      | Neotropical Entomology                                 |
| Deloya et al.                | 2013 Necrophilous Scarabaeidae and Trogidae beetles (Coleoptera) from Acahuizotla, Guerrero, Mexico             | Revista Colombiana de entomologia                      |
| Dominguez et al.             | 2015 Structure of Dung Beetle Communities in an Altitudinal Gradient of...                                      | Neotropical Entomology                                 |
| Endres et al.                | 2007 Diversity of Scarabaeidae s. str. (Coleoptera) in the Reserva Biologica Guaribas                           | Revista Brasileira de entomologia                      |
| Ernesto et al.               | 2018 Hexapod decomposers of Serra de Santa Catarina, Paraiba, Brazil: an...                                     | Biota Neotropica                                       |
| Escobar                      | 2004 Diversity and composition of dung beetle (Scarabaeinae) assemblages in a...                                | Tropical Zoology                                       |
| Escobar & de Ulloa           | 2000 Space and time distribution along a successional gradient of coprofaunous...                               | Revista de Biologia Tropical                           |
| Escobar et al.               | 2008 Temporal shifts in dung beetle community structure within a protected...                                   | Journal of Applied Ecology                             |
| Estrada & Coates-Estrada     | 1991 HOWLER MONKEYS (ALOUATTA-PALLIATA), DUNG BEETLES (SCARABAEIDAE) AND SEED DISPERSAL...                      | Journal of Tropical Ecology                            |
| Estrada & Coates-Estrada     | 2002 Dung beetles in continuous forest, forest fragments and in an...                                           | Biodiversity and Conservation                          |
| Estrada et al.               | 1993 DUNG BEETLES ATTRACTED TO MAMMALIAN HERBIVORE (ALOUATTA-PALLIATA) AND OMNIVORE...                          | Journal of Tropical Ecology                            |
| Estrada et al.               | 1999 Tropical rain forest fragmentation, howler monkeys (Alouatta palliata), and dung...                        | American Journal of Primatology                        |
| Fagundes et al.              | 2011 Diversity of the families of Coleoptera captured with pitfall traps                                        | Brazilian Journal of biology                           |
| Ferreira et al.              | 2018 Climatic variables drive temporal patterns of alpha and beta diversities...                                | Bulletin of entomological research                     |
| Ferrer-Paris et al.          | 2013 Sampling optimization for tropical invertebrates: An example using dung beetles...                         | Revista de Biologia Tropical                           |
| Filgueiras et al.            | 2009 Attractivity of omnivore, carnivore and herbivore mammalian dung to Scarabaeinae...                        | Revista Brasileira de entomologia                      |
| Filgueiras et al.            | 2011 Habitat fragmentation alters the structure of dung beetle communities in...                                | Biological Conservation                                |
| Filgueiras et al.            | 2015 Dung beetle persistence in human-modified landscapes: Combining indicator species with...                  | ECOLOGICAL INDICATORS                                  |
| Flechtmann et al.            | 2009 Influence of carrion smell and rebaiting time on the efficiency...                                         | ENTOMOLOGIA EXPERIMENTALIS ET APPLICATA                |
| Frizzas et al.               | 2020 Diversity of Scarabaeinae (Coleoptera: Scarabaeidae) in an urban fragment of...                            | EUROPEAN JOURNAL OF ENTOMOLOGY                         |
| Fuzessy et al.               | 2022 Linking howler monkey ranging and defecation patterns to primary and...                                    | AMERICAN JOURNAL OF PRIMATOLOGY                        |
| Ganho & Marioni              | 2005 The inventory diversity of Coleoptera (Insecta) of an anthropized landscape...                             | REVISTA BRASILEIRA DE ENTOMOLOGIA                      |
| Gatty & Grandez              | 2020 Effectiveness of distinct organic baits while pitfall trapping saprophagous beetles...                     | CIENCIA AMAZONICA                                      |
| Gatty et al.                 | 2020 Dung beetles (Coleoptera: Scarabaeidae: Scarabaeinae) in white sand forest of...                           | CIENCIA AMAZONICA                                      |
| Giraldo et al.               | 2011 The adoption of silvopastoral systems promotes the recovery of ecological...                               | INSECT CONSERVATION AND DIVERSITY                      |
| Golin et al.                 | 2011 Dispersal and predation of araticum seeds in the Cerrado of...                                             | CIENCIA RURAL                                          |
| Gomez-Cifuentes et al.       | 2017 Influence of land use on the taxonomic and functional diversity...                                         | JOURNAL OF INSECT CONSERVATION                         |
| Gomez-Cifuentes et al.       | 2019 Tree retention in cattle ranching systems partially preserves dung beetle...                               | BASIC AND APPLIED ECOLOGY                              |
| Gonzalez-Hernandez et al.    | 2015 Necrocolous beetles (Scarabaeidae: Scarabaeinae, Silphidae and Trogidae) from Bosque Los                   | REVISTA MEXICANA DE BIODIVERSIDAD                      |
| Gonzalez-Tokman et al.       | 2018 Success or failure: the role of ecological restoration on the                                              | REVISTA MEXICANA DE BIODIVERSIDAD                      |
| Guedes et al.                | 2019 Composition and species richness of the community of Coleoptera (Insecta)                                  | IHERINGIA SERIE ZOOLOGIA                               |
| Guerra Alonso et al.         | 2019 Livestock areas with canopy cover sustain dung beetle diversity in the humid subtropical Chaco forest      | Insect Conservation and diversity                      |
| Guerra Alonso et al.         | 2020 Dung beetles response to livestock management in three different regional contexts                         | Scientific reports                                     |
| Guerra Alonso et al.         | 2020 Response of dung beetle taxonomic and functional diversity to livestock grazing in an arid ecosystem       | Ecological Entomology                                  |
| Halffer & Arellano           | 2002 Response of dung beetle diversity to human-induced changes in                                              | BIOTROPICA                                             |
| Halffer et al.               | 2007 Instability of copronecrophagous beetle assemblages (Coleoptera : Scarabaeinae) in a mountainous           | ENVIRONMENTAL ENTOMOLOGY                               |
| Harada et al.                | 2020 Comparison of dung beetle communities (Coleoptera: Scarabaeidae: Scarabaeinae) in oil                      | REVISTA BRASILEIRA DE ENTOMOLOGIA                      |
| Hernandez & Vaz-de-Mello     | 2009 Seasonal and spatial species richness variation of dung beetle (Coleoptera,                                | REVISTA BRASILEIRA DE ENTOMOLOGIA                      |
| Hernandez et al.             | 2014 Response of a dung beetle assemblage along a reforestation gradient                                        | JOURNAL OF INSECT CONSERVATION                         |
| Hernandez et al.             | 2019 ECOLOGICAL CHARACTERISTICS OF ATLANTIC FOREST DUNG BEETLES (COLEOPTERA: SCARABAEIDAE: SCARABAEINAE)        | COLEOPTERISTS BULLETIN                                 |
| Hernandez et al.             | 2021 Dung-beetle (Coleoptera: Scarabaeidae: Scarabaeinae) assemblage in two livestock production systems        | CANADIAN ENTOMOLOGIST                                  |
| Ibarra-Polesel et al.        | 2015 Copronecrophagous scarab beetles (Scarabaeidae: Scarabaeinae) from Colonia Benitez Educative Natural       | REVISTA MEXICANA DE BIODIVERSIDAD                      |
| Korasaki et al.              | 2013 Using dung beetles to evaluate the effects of urbanization on                                              | INSECT SCIENCE                                         |
| Liberal et al.               | 2011 How habitat change and rainfall affect dung beetle diversity in                                            | JOURNAL OF INSECT SCIENCE                              |
| Lopes et al.                 | 2011 A comparison of dung beetle assemblage structure (Coleoptera: Scarabaeidae: Scarabaeinae)                  | ZOOLOGIA                                               |
| Lopes et al.                 | 2020 Diversity of coleopterans associated with cattle dung in open pastures                                     | AGROFORESTRY SYSTEMS                                   |
| Louzada & Silva              | 2009 Utilisation of introduced Brazilian pastures ecosystems by native dung beetles                             | INSECT CONSERVATION AND DIVERSITY                      |
| Lugo et al.                  | 2013 Nocturnal species of Scarabaeoidea (Coleoptera: Polyphaga) in northern Sinaloa, Mexico                     | REVISTA COLOMBIANA DE ENTOMOLOGIA                      |
| Lugo-Garcia et al.           | 2014 Coleoptera Scarabaeoidea Collected with Light Trap in Deciduous Tropical Forest                            | SOUTHWESTERN ENTOMOLOGIST                              |
| Macedo et al.                | 2020 Conversion of Cerrado savannas into exotic pastures: The relative importance                               | AGRICULTURE ECOSYSTEMS & ENVIRONMENT                   |
| Martello et al.              | 2016 Edge and land use effects on dung beetles (Coleoptera: Scarabaeidae...                                     | JOURNAL OF INSECT CONSERVATION                         |
| Martinez & Suarez            | 2006 Phenology, trophic preferences, and reproductive activity in some dung-inhabiting beetles...               | PROCEEDINGS OF THE ENTOMOLOGICAL SOCIETY OF WASHINGTON |
| Martinez et al.              | 2009 Escarabajos Coprófagos (Coleoptera: Scarabaeinae) de la Vertiente Noroccidental, Sierra Nevada...          | Neotropical Entomology                                 |
| Martinez-Falcon et al.       | 2018 Populations and assemblages living on the edge: dung beetles responses...                                  | PEERJ                                                  |
| Martinez-Hernandez et al.    | 2022 Size does matter! Incidence of bait size on the capture...                                                 | REVISTA DE BIOLOGIA TROPICAL                           |
| Mayer & Vasconcelos          | 2013 Necrophagous beetles associated with carcasses in a semi-arid environment...                               | Forensic Science International                         |
| Medina & Lopes               | 2014 Resource Utilization and Temporal Segregation of Scarabaeinae (Coleoptera, Scarabaeidae) Community...      | Neotropical Entomology                                 |
| Medina & Lopes               | 2014 Seasonality in the dung beetle community in a Brazilian tropical...                                        | Journal of Insect Science                              |
| Mendes & Linhares            | 2006 Coleoptera associated with undisturbed cow pats in pastures in southeastern...                             | Neotropical Entomology                                 |
| Mesquita et al.              | 2021 Anthropogenic disturbance may promote the invasion of forest landscape by...                               | Biologia                                               |
| Milhomem et al.              | 2003 Collection techniques of dung beetle in the Cerrado, Brazil                                                | Pesquisa Agropecuária Brasileira                       |
| Miranda-Flores et al.        | 2020 Landscape diversity and removal of manure by dung beetles in...                                            | Revista Mexicana de Biodiversidad                      |
| Mise et al.                  | 2010 Coleoptera associated with pig carcass exposed in a forest reserve...                                      | Biota Neotropica                                       |
| Moctezuma                    | 2021 Spatial autocorrelation in a Mexican dung beetle ensemble: Implications for...                             | Ecological Indicators                                  |
| Moctezuma et al.             | 2016 Response of copronecrophagous beetle communities to habitat disturbance in two...                          | Journal of Insect Conservation                         |
| Montero et al.               | 2011 Seasonal assemblages of epigeal arthropods in a quebracho forest (Schinopsis...                            | Revista Colombiana de Entomologia                      |

|                                     |                                                                                                                                           |                                                  |
|-------------------------------------|-------------------------------------------------------------------------------------------------------------------------------------------|--------------------------------------------------|
| Montes de Oca & Halffler            | 1995 Daily and seasonal activities of a guild of the coprophagous...                                                                      | Tropical Zoology                                 |
| Montes de Oca & Halffler            | 1998 Invasion of Mexico by two dung beetles previously introduced into...                                                                 | Study Neotropical fauna & environment            |
| Montes-Rodriguez et al.             | 2019 Edge effect in assemblages of dung beetles (Coleoptera: Scarabaeidae) in...                                                          | Caldasia                                         |
| Montoya-Molina et al.               | 2015 Land sharing vs. land sparing in the dry Caribbean lowlands...                                                                       | Applied Soil Ecology                             |
| Morales-Alba et al.                 | 2022 Bigger and stronger bury deeper: the role of dung beetles...                                                                         | International Journal of Tropical Insect Science |
| Morelli et al.                      | 1997 Dung beetles (Coleoptera: Scarabaeidae) inhabiting bovine and ovine droppings in...                                                  | The Coleopterists Bulletin                       |
| Moron & Arce-Perez                  | 2016 Soil Scarab Beetles at Santa Marta, Los Tuxtlas, Veracruz, Mexico                                                                    | Southwestern Entomologist                        |
| Moron-Rios & Moron                  | 2016 Evaluation of the Fauna of Coleoptera Scarabaeoidea from the Calakmul...                                                             | Southwestern Entomologist                        |
| Naranjo-Lopez & Navarrete-Heredia   | 2011 Carrion beetles (Histeridae, Silphidae and Scarabaeidae) from two localities in...                                                   | Revist Colombiana de Entomologia                 |
| Navarrete & Halffler                | 2008 Dung beetle (Coleoptera : Scarabaeidae : Scarabaeinae) diversity in continuous forest, forest...                                     | Biodiversity and Conservation                    |
| Neita & Escobar                     | 2012 The potential value of agroforestry to dung beetle diversity in...                                                                   | Agroforest Systems                               |
| Noriega & Acosta                    | 2011 Population size and dispersal of Sulcophanaeus leander (Coleoptera: Scarabaeidae) on...                                              | Journal of Tropical Ecology                      |
| Noriega et al.                      | 2007 Seasonal dynamics of the trophic structure of an assemblage of...                                                                    | Revist Colombiana de Entomologia                 |
| Novais et al.                       | 2016 How Does Dung Beetle (Coleoptera: Scarabaeidae) Diversity Vary Along a...                                                            | Journal of Insect Science                        |
| Nunes et al.                        | 2012 Scarabaeinae (Coleoptera: Scarabaeidae) of a rupestrian field at Cafuringa, Distrito...                                              | BIOTA NEOTROPICA                                 |
| Nunes et al.                        | 2016 Dung Beetles along a Tropical Altitudinal Gradient: Environmental Filtering on...                                                    | PLOS ONE                                         |
| Nunes et al.                        | 2018 Fire? They don't give a dung! The resilience of dung...                                                                              | Ecological Entomology                            |
| Nunes et al.                        | 2018 Linking Biodiversity, the Environment and Ecosystem Functioning: Ecological Functions of...                                          | ECOSYSTEMS                                       |
| Oliveira et al.                     | 2021 Changes in land use affect dung beetle communities but do...                                                                         | ECOLOGICAL ENTOMOLOGY                            |
| Ortega-Martinez et al.              | 2016 A dirty job: manure removal by dung beetles in both...                                                                               | ENTOMOLOGIA EXPERIMENTALIS ET APPLICATA          |
| Ortega-Martinez et al.              | 2020 Assembly mechanisms of dung beetles in temperate forests and grazing...                                                              | SCIENTIFIC REPORTS                               |
| Ortega-Martinez et al.              | 2021 The relationship between dung beetle diversity and manure removal in...                                                              | COMMUNITY ECOLOGY                                |
| Otavo et al.                        | 2013 Scarabaeoidea superfamily (Insecta: Coleoptera) as a bioindicator element of anthropogenic...                                        | REVISTA DE BIOLOGIA TROPICAL                     |
| Perez-Villamares et al.             | 2016 Beetles attracted to carrion (Coleoptera: Scarabaeidae, Geotrupidae, Hybosoridae, Trogidae and...                                    | REVISTA MEXICANA DE BIODIVERSIDAD                |
| Pessoa et al.                       | 2017 Assemblage and functional categorization of dung beetles (Coleoptera: Scarabaeinae) from...                                          | PEERJ                                            |
| Peyras et al.                       | 2013 Quantifying edge effects: the role of habitat contrast and species...                                                                | JOURNAL OF INSECT CONSERVATION                   |
| Ponce-Santizo et al.                | 2006 Primary dispersal of seeds by primates and secondary dispersal by...                                                                 | BIOTROPICA                                       |
| Puker et al.                        | 2013 Dung Beetles (Coleoptera: Scarabaeidae) Attracted to Dung of the Largest...                                                          | ENVIRONMENTAL ENTOMOLOGY                         |
| Puker et al.                        | 2014 Deltochilini and Phanaeini dung beetles (Coleoptera: Scarabaeidae: Scarabaeinae) in introduced...                                    | JOURNAL OF NATURAL HISTORY                       |
| Puker et al.                        | 2020 Dung beetles collected using flight intercept traps in an Amazon...                                                                  | INTERNATIONAL JOURNAL OF TROPICAL INSECT SCIENCE |
| Puker et al.                        | 2021 Using aerial fruit-baited traps with different naturally fermented baits to...                                                       | STUDIES ON NEOTROPICAL FAUNA AND ENVIRONMENT     |
| Ramirez-Ponce et al.                | 2019 Biotic heterogeneity among scarab beetle communities in an anthropized landscape...                                                  | JOURNAL OF INSECT CONSERVATION                   |
| Rangel-Acosta & Martínez-Hernandez  | 2017 Comparison of copro-necrophagous beetle assemblages (Scarabaeidae: Scarabaeinae) among tropical dry...                               | REVISTA MEXICANA DE BIODIVERSIDAD                |
| Rangel-Acosta et al.                | 2020 Response of dung beetles (Scarabaeidae: Scarabaeinae) to habitat modification caused...                                              | REVISTA MEXICANA DE BIODIVERSIDAD                |
| Reyes-Hernandez & Navarrete-Heredia | 2019 Species assemblage of carrion beetles (Coleoptera: Scarabaeidae, Silphidae, Trogidae) in...                                          | COLEOPTERISTS BULLETIN                           |
| Reyes-Novelo et al.                 | 2007 Copro-necrophagous beetle (Coleoptera : Scarabaeidae) diversity in an agroecosystem in Yucatan...                                    | REVISTA DE BIOLOGIA TROPICAL                     |
| Rios-Diaz et al.                    | 2021 Sheep herding in small grasslands promotes dung beetle diversity in...                                                               | JOURNAL OF INSECT CONSERVATION                   |
| Rivera et al.                       | 2020 Mechanisms of diversity maintenance in dung beetle assemblages in a...                                                               | PeerJ                                            |
| Rivera et al.                       | 2021 Landscape effects on taxonomic and functional diversity of dung beetle...                                                            | FOREST ECOLOGY AND MANAGEMENT                    |
| Rocha-Ortega & Coronel-Arelhano     | 2019 How predictable are the responses of ant and dung beetle...                                                                          | Landscape and Ecological Engineering             |
| Rodrigues & Puker                   | 2013 Species of Geotrupidae (Coleoptera: Scarabaeoidea) in Aquidauana, Mato Grosso do...                                                  | Biota Neotropica                                 |
| Rodrigues et al.                    | 2010 Diversidade de besouros coprófagos (Coleoptera, Scarabaeidae) coletados com armadilha de...                                          | Biota Neotropica                                 |
| Rodrigues et al.                    | 2013 Dung beetles (Coleoptera: Scarabaeoidea) in three landscapes in Mato Grosso...                                                       | Brazilian Journal of Biology                     |
| Rodriguez-López et al.              | 2021 Attraction of Canthon vazquezae (Coleoptera: Scarabaeinae) to Volatiles Released by...                                               | Honelyn                                          |
| Rodriguez-López et al.              | 2021 Evaluación del estiércol de mamíferos nativos como potenciales atrayentes para...                                                    | Neotropical Biodiversity                         |
| Rös et al.                          | 2012 How dung beetles respond to a human-modified variegated landscape in...                                                              | Diversity and Distributions                      |
| Rosa et al.                         | 2011 Arthropods associated with pig carrion in two vegetation profiles of...                                                              | Revista Brasileira de Entomologia                |
| Ruiz-Pérez et al.                   | 2019 Community forest management in southern Mexico: a sustainable practice for...                                                        | Revista Mexicana de Biodiversidad                |
| Salomão & Iannuzzi                  | 2015 Dung beetle (Coleoptera, Scarabaeidae) assemblage of a highly fragmented landscape...                                                | Revista Brasileira de Entomologia                |
| Salomão & Iannuzzi                  | 2017 How do regeneration stages of Caatinga forests influence the structure...                                                            | The Coleopterists Bulletin                       |
| Salomão et al.                      | 2018 Attractiveness of Different Food Resources to Dung Beetles (Coleoptera: Scarabaeidae)                                                | Neotropical Entomology                           |
| Salomão et al.                      | 2018 Landscape structure and composition define the body condition of dung...                                                             | Ecological Indicators                            |
| Salomão et al.                      | 2019 Contest dynamics for food and reproductive resources are defined by...                                                               | Ethology                                         |
| Salomão et al.                      | 2019 Dung beetles (Coleoptera: Scarabaeinae) in a mosaic habitat at the...                                                                | International Journal of Tropical Insect Science |
| Salomão et al.                      | 2019 Effects of environmental parameters on beetle assemblage in a fragmented...                                                          | Journal of Insect Conservation                   |
| Salomão et al.                      | 2019 Urbanization effects on dung beetle assemblages in a tropical city                                                                   | Ecological Indicators                            |
| Salomão et al.                      | 2020 Negative effects of urbanisation on the physical condition of an...                                                                  | Ecological Entomology                            |
| Salomão et al.                      | 2020 Spatial and temporal changes in the dung beetle diversity of...                                                                      | Ecological Indicators                            |
| Salomão et al.                      | 2022 Dung or carrion? Sex and age determine resource attraction in...                                                                     | Ecological Entomology                            |
| Salomão et al.                      | 2022 Water table level and soil texture are important drivers of...                                                                       | Applied Soil Ecology                             |
| Sánchez-De-Jesús et al.             | 2016 Forest loss and matrix composition are the major drivers shaping...                                                                  | Landscape Ecology                                |
| Sánchez-Hernández et al.            | 2018 Copronecrophagous beetle diversity (Coleoptera: Scarabaeidae: Scarabaeinae) in the Selva EL...                                       | Caldasia                                         |
| Santana et al.                      | 2017 Insects of the Sacarabaeidae family associated with guava (Psidium guajava L.)...                                                    | Centro Agrícola                                  |
| Santos et al.                       | 2014 Beetles (Insecta, Coleoptera) associated with pig carcasses exposed in a...                                                          | BRAZILIAN JOURNAL OF BIOLOGY                     |
| Santos-Heredia & Andresen           | 2014 Upward movement of buried seeds: another ecological role of dung...                                                                  | Journal of Tropical Ecology                      |
| Santos-Heredia et al.               | 2010 Secondary seed dispersal by dung beetles in a Colombian rain...                                                                      | Journal of Tropical Ecology                      |
| Santos-Heredia et al.               | 2011 Secondary seed dispersal by dung beetles in an Amazonian forest...                                                                   | Integrative Zoology                              |
| Santos-Heredia et al.               | 2018 Dung beetles and their ecological functions in three agroforestry systems...                                                         | BIODIVERSITY AND CONSERVATION                    |
| Sarges et al.                       | 2012 The importance of frugivory to the survival of the dung...                                                                           | COLEOPTERISTS BULLETIN                           |
| Sarmiento-Garces & Hernandez        | 2021 A decrease in taxonomic and functional diversity of dung beetles...                                                                  | PLOS ONE                                         |
| Silva et al.                        | 2016 Dung beetle (Coleoptera: Scarabaeinae) persistence in Amazonian forest fragments and...                                              | JOURNAL OF INSECT CONSERVATION                   |
| Tissiani et al.                     | 2015 Environmental influence on coprophagous Scarabaeidae (Insecta, Coleoptera) assemblages in the...                                     | BRAZILIAN JOURNAL OF BIOLOGY                     |
| Trevilla-Rebollar et al.            | 2010 Necrophilous Coleoptera (Scarabaeidae, Silphidae y Trogidae) of Malinalco, State of Mexico, Mexico                                   | NEOTROPICAL ENTOMOLOGY                           |
| Trujillo-Miranda et al.             | 2016 Structure and composition of the community of beetles (Coleoptera: Scarabaeoidea) from Chacateca's Hill, Zapotitlan, Puebla, Mexico  | REVISTA MEXICANA DE BIODIVERSIDAD                |
| Uchara-Prado et al.                 | 2009 Selecting terrestrial arthropods as indicators of small-scale disturbance: A first approach in the Brazilian Atlantic Forest         | BIOLOGICAL CONSERVATION                          |
| Urrea-Galeano et al.                | 2019 Dung beetle activity affects rain forest seed bank dynamics and seedling establishment                                               | BIOTROPICA                                       |
| Urrea-Galeano et al.                | 2019 Horizontal seed dispersal by dung beetles reduced seed and seedling clumping, but did not increase short-term seedling establishment | PLOS ONE                                         |
| Viegas et al.                       | 2014 Dung beetle communities as biological indicators of riparian forest widths in southern Brazil                                        | ECOLOGICAL INDICATORS                            |
| Vieira et al.                       | 2017 Dung beetles in a Caatinga Natural Reserve: a threatened Brazilian dry-forest with high biological value                             | IHERINGIA SERIE ZOOLOGIA                         |
| Villada-Bedoya et al.               | 2017 Edge effects on dung beetle assemblages in an Andean mosaic of forest and coffee plantations                                         | BIOTROPICA                                       |
| Yanes-Gomez et al.                  | 2018 Scarabaeinae Species in the Atoyac-Tehuiztingo Basin at Puebla, Mexico: Diversity and Use as Bioindicators                           | SOUTHWESTERN ENTOMOLOGIST                        |
